# Supplementary material for: Combined resection of the transpancreatic common hepatic artery preserving the gastric arterial arcade without arterial reconstruction in hepatopancreatoduodenectomy: a case report
Source: PubMed Central journal article supplement (PMC6020092; doi:10.1186/s40792-018-0474-8), 2018-06-26

**Figure S1**

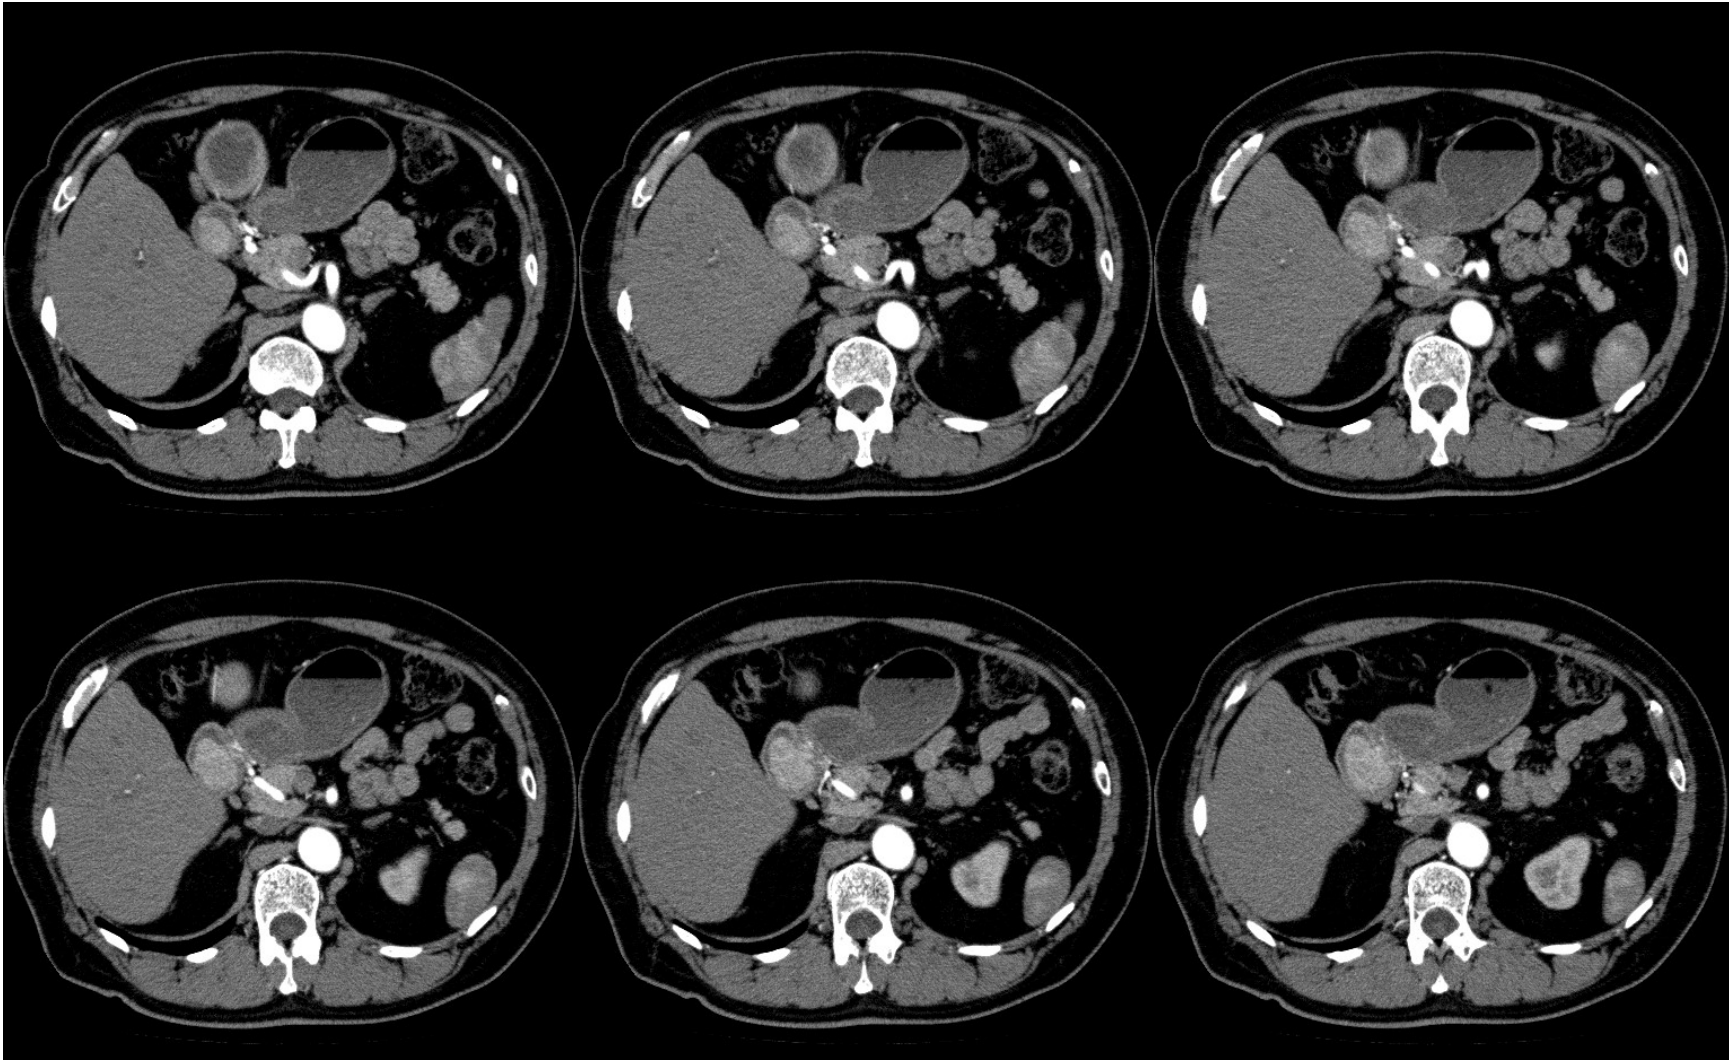

Supplement: 40792_2018_474_MOESM1_ESM.pdf [file 40792_2018_474_MOESM1_ESM.pdf]
